# Supplementary material for: The Complete Plastid Genome Sequence of the Secondarily Nonphotosynthetic Alga Cryptomonas paramecium: Reduction, Compaction, and Accelerated Evolutionary Rate
Source: PubMed Central journal article supplement — Genome Biol Evol. 2009 Nov 13;1:439–48. doi: 10.1093/gbe/evp047 (PMC2839278; doi:10.1093/gbe/evp047), 2009-11-13
Supplement: evp047_1.pdf [file evp047_1.pdf]

**Table S1.**—Presence/absence of 154 genes in the plastid genomes of diverse primary and secondary plastid-containing organisms, as well as a representative cyanobacterium. The column designated "Tree" indicates whether the *Cryptomonas paramecium* homolog branches with the cryptomonads *Rhodomonas salina* and *Guillardia theta* in a phylogenetic tree (T) or does not branch with sequences from these two species (F) (see main text). "+" = gene present, "-" = gene absent, "y" = pseudogene, "#" means the *C. paramecium* protein could not be analyzed in a phylogenetic tree. Abbreviations: orf; open reading frame, C.p; *Cryptomonas paramecium*, R.s; *Rhodomonas salina*, G.t; *Guillardia theta*, E.h; *Emiliania huxleyi*, O.s; *Odontella sinensis*, P.t; *Phaeodactylum tricornutum*, T.p; *Thalassiosira pseudonana*, P.p; *Porphyra purpurea*, Gr.t; *Gracilaria tenuistipitata*, C.c; *Cyanidium caldarium*, C.m; *Cyanidioschyzon merolae*, C.pa; *Cyanophora paradoxa*, C.r; *Chlamydomonas reinhardtii*, E.g; *Euglena gracilis*, B.n; *Bigelowiella natans*, A.m; *Aneura mirabilis*, E.l; *Euglena longa*, E.v; *Epifagus virginiana*, H.s; *Helicosporidium* sp., T.g; *Toxoplasma gondii*, P.f; *Plasmodium falciparum*, Syn; *Synechocystis* sp. PCC6803. Cp vs. Rs; pair-wise distances between *Cryptomonas paramecium* and *Rhodomonas salina* protein homologs, Cp vs. Gt; pair-wise distance between *Cryptomonas paramecium* and *Guillardia theta* protein homologs, Rs vs. Gt; pair-wise distance between *Rhodomonas salina* and *Guillardia theta* protein homologs.

| Gene   | C.p | R.s | G.t | E.h | O.s | T.p | P.t | P.p | Gr.t | C.c | C.m | Cy.p | C.r | E.g | B.n | A.m | E.l | E.v | H.s | T.g | P.f | Syn | Tree | Cp vs. Rs | Cp vs. Gt | Rs vs. Gt |
|--------|-----|-----|-----|-----|-----|-----|-----|-----|------|-----|-----|------|-----|-----|-----|-----|-----|-----|-----|-----|-----|-----|------|-----------|-----------|-----------|
| rps4   | +   | +   | +   | +   | +   | +   | +   | +   | +    | +   | +   | +    | +   | +   | +   | +   | +   | +   | +   | +   | +   | +   | T    | 0.131     | 0.176     | 0.038     |
| orf335 | +   | +   | +   | -   | -   | -   | -   | +   | +    | -   | -   | -    | -   | -   | -   | -   | -   | -   | -   | -   | -   | -   | F    | 1.166     | 1.403     | 0.749     |
| rbcL   | +   | +   | +   | +   | +   | +   | +   | +   | +    | +   | +   | +    | +   | +   | +   | +   | +   | -   | -   | -   | -   | -   | T    | 0.095     | 0.081     | 0.056     |
| rbcS   | +   | +   | +   | +   | +   | +   | +   | +   | +    | +   | +   | +    | -   | -   | -   | -   | -   | -   | -   | -   | -   | -   | T    | 0.157     | 0.220     | 0.107     |
| cbbX   | +   | +   | +   | +   | +   | +   | +   | +   | +    | +   | +   | -    | -   | -   | -   | -   | -   | -   | -   | -   | -   | -   | T    | 0.270     | 0.274     | 0.108     |
| ilvH   | +   | +   | +   | -   | -   | -   | -   | +   | +    | +   | +   | -    | -   | -   | -   | -   | -   | -   | -   | -   | -   | -   | F    | 0.298     | 0.339     | 0.238     |
| cemA   | +   | +   | +   | -   | -   | -   | -   | +   | +    | +   | +   | -    | +   | -   | -   | +   | -   | -   | -   | -   | -   | -   | T    | 0.249     | 0.242     | 0.099     |
| sufB   | +   | +   | +   | +   | +   | +   | +   | +   | +    | +   | +   | +    | -   | -   | -   | -   | -   | -   | -   | +   | +   | +   | T    | 0.305     | 0.352     | 0.251     |
| sufC   | +   | +   | +   | -   | +   | +   | +   | +   | +    | +   | +   | +    | -   | -   | -   | -   | -   | -   | -   | -   | -   | -   | T    | 0.435     | 0.529     | 0.391     |
| atpA   | +   | +   | +   | +   | +   | +   | +   | +   | +    | +   | +   | +    | +   | +   | +   | +   | -   | -   | -   | -   | -   | -   | T    | 0.388     | 0.395     | 0.094     |
| atpD   | +   | +   | +   | +   | +   | +   | +   | +   | +    | +   | +   | +    | -   | -   | -   | -   | -   | -   | -   | -   | -   | -   | T    | 1.378     | 1.345     | 0.605     |
| atpF   | y   | +   | +   | +   | +   | +   | +   | +   | +    | +   | +   | +    | +   | +   | +   | +   | -   | -   | -   | -   | -   | -   | #    |           |           |           |
| atpG   | +   | +   | +   | +   | +   | +   | +   | +   | +    | +   | +   | +    | -   | -   | -   | -   | -   | -   | -   | -   | -   | -   | F    | 1.221     | 1.207     | 0.207     |
| atpH   | +   | +   | +   | +   | +   | +   | +   | +   | +    | +   | +   | +    | +   | +   | +   | +   | -   | -   | -   | -   | -   | -   | F    | 0.140     | 0.140     | 0.000     |
| atpI   | +   | +   | +   | +   | +   | +   | +   | +   | +    | +   | +   | -    | +   | +   | +   | +   | -   | -   | -   | -   | -   | -   | F    | 0.552     | 0.553     | 0.095     |
| tsf    | +   | +   | +   | -   | -   | -   | +   | +   | +    | +   | +   | -    | -   | -   | -   | -   | -   | -   | -   | -   | -   | -   | F    | 0.553     | 0.524     | 0.320     |
| rps2   | +   | +   | +   | +   | +   | +   | +   | +   | +    | +   | +   | +    | +   | +   | +   | +   | +   | +   | -   | +   | +   | +   | F    | 0.514     | 0.524     | 0.199     |
| rpoC2  | +   | +   | +   | +   | +   | +   | +   | +   | +    | +   | -   | +    | +   | +   | +   | +   | +   | -   | +   | -   | -   | +   | T    | 0.621     | 0.643     | 0.270     |
| rpoC1  | +   | +   | +   | +   | +   | +   | +   | +   | +    | +   | -   | +    | +   | +   | +   | +   | +   | -   | +   | +   | +   | +   | T    | 0.395     | 0.411     | 0.121     |
| rpoB   | +   | +   | +   | +   | +   | +   | +   | +   | +    | +   | +   | +    | +   | +   | +   | +   | +   | -   | +   | +   | +   | +   | T    | 0.403     | 0.394     | 0.114     |
| rps20  | +   | +   | +   | -   | -   | -   | +   | +   | +    | -   | +   | +    | -   | -   | -   | -   | -   | -   | -   | -   | -   | -   | T    | 0.619     | 0.658     | 0.454     |
| rpl33  | +   | +   | +   | +   | +   | +   | +   | +   | +    | +   | +   | +    | -   | -   | -   | +   | -   | +   | -   | -   | -   | +   | F    | 0.286     | 0.306     | 0.234     |
| rps18  | +   | +   | +   | +   | +   | +   | +   | +   | +    | +   | +   | +    | +   | +   | +   | +   | -   | +   | -   | -   | -   | +   | F    | 0.864     | 0.889     | 0.272     |
| infB   | +   | +   | +   | -   | -   | -   | -   | +   | +    | -   | +   | -    | -   | -   | -   | -   | -   | -   | -   | -   | -   | -   | F    | 1.116     | 1.197     | 0.695     |
| atpB   | +   | +   | +   | +   | +   | +   | +   | +   | +    | +   | +   | +    | +   | +   | +   | +   | -   | -   | -   | -   | -   | -   | T    | 0.265     | 0.270     | 0.093     |
| atpE   | +   | +   | +   | +   | +   | +   | +   | +   | +    | +   | +   | +    | +   | +   | -   | +   | -   | -   | -   | -   | -   | -   | F    | 1.562     | 1.581     | 0.148     |
| tatC   | +   | +   | +   | +   | +   | +   | +   | +   | +    | +   | +   | -    | -   | -   | -   | -   | -   | -   | -   | -   | -   | -   | T    | 0.955     | 1.017     | 0.317     |
| rpl20  | +   | +   | +   | +   | +   | +   | +   | +   | +    | +   | +   | +    | +   | +   | +   | +   | +   | +   | +   | -   | -   | +   | T    | 0.420     | 0.355     | 0.335     |
| rpl35  | +   | +   | +   | +   | +   | +   | +   | +   | +    | +   | +   | +    | -   | -   | -   | -   | -   | -   | -   | -   | -   | -   | T    | 0.829     | 0.893     | 0.549     |
| pbsA   | +   | +   | +   | -   | -   | -   | -   | +   | +    | -   | -   | -    | -   | -   | -   | -   | -   | -   | -   | -   | -   | -   | T    | 0.769     | 0.786     | 0.486     |
| rps14  | +   | +   | +   | +   | +   | +   | +   | +   | +    | +   | +   | +    | +   | +   | +   | +   | +   | +   | +   | -   | -   | +   | F    | 0.572     | 0.535     | 0.410     |
| acpP   | +   | +   | +   | -   | +   | -   | +   | +   | +    | +   | +   | +    | -   | -   | -   | -   | -   | -   | -   | -   | -   | -   | F    | 0.131     | 0.176     | 0.038     |
| dnaK   | +   | +   | +   | +   | +   | +   | +   | +   | +    | +   | +   | +    | +   | -   | -   | -   | -   | -   | -   | -   | -   | -   | T    | 0.203     | 0.196     | 0.130     |

Donaher et al. Table S1

|            |   |   |   |   |   |   |   |   |   |   |   |   |   |   |   |   |   |   |   |   |   |   |   |       |       |       |
|------------|---|---|---|---|---|---|---|---|---|---|---|---|---|---|---|---|---|---|---|---|---|---|---|-------|-------|-------|
| rpl3       | + | + | + | + | + | + | + | + | + | + | + | + | - | - | - | - | - | - | - | - | - | + | F | 0.561 | 0.612 | 0.477 |
| rpl4       | + | + | + | - | + | + | + | + | + | + | + | + | - | - | - | - | - | - | - | - | - | + | F | 0.856 | 1.137 | 0.880 |
| rpl23      | + | + | + | + | + | + | + | + | + | + | + | + | - | + | + | + | + | + | - | - | - | + | F | 0.632 | 0.888 | 0.504 |
| rpl2       | + | + | + | + | + | + | + | + | + | + | + | + | + | + | + | + | + | + | + | + | + | + | T | 0.460 | 0.494 | 0.249 |
| rps19      | + | + | + | + | + | + | + | + | + | + | + | + | + | + | + | + | + | + | + | + | + | + | F | 0.433 | 0.433 | 0.258 |
| rpl22      | + | + | + | + | + | + | + | + | + | + | + | + | - | + | - | + | + | - | - | - | - | + | T | 0.530 | 0.564 | 0.367 |
| rps3       | + | + | + | + | + | + | + | + | + | + | + | + | + | + | + | + | + | + | + | + | - | + | T | 0.653 | 0.671 | 0.271 |
| rpl16      | + | + | + | + | + | + | + | + | + | + | + | + | + | + | + | + | + | + | + | + | + | + | T | 0.306 | 0.284 | 0.183 |
| rpl29      | + | + | + | - | + | + | + | + | + | + | + | + | - | - | - | - | - | - | - | - | - | + | F | 0.907 | 0.979 | 0.691 |
| rps17      | + | + | + | + | + | + | + | + | + | + | + | + | - | - | - | - | - | - | - | + | + | + | F | 0.424 | 0.457 | 0.287 |
| rpl14      | + | + | + | + | + | + | + | + | + | + | + | + | + | + | + | + | + | + | + | + | - | + | F | 0.245 | 0.267 | 0.048 |
| rpl24      | + | + | + | - | + | + | + | + | + | + | + | + | - | - | - | - | - | - | - | - | - | + | F | 0.801 | 0.782 | 0.558 |
| rpl5       | + | + | + | + | + | + | + | + | + | + | + | + | + | + | + | - | + | - | + | - | - | + | T | 0.404 | 0.370 | 0.299 |
| rps8       | + | + | + | + | + | + | + | + | + | + | + | + | + | + | + | + | + | + | + | + | - | + | F | 0.369 | 0.365 | 0.142 |
| rpl6       | + | + | + | + | + | + | + | + | + | + | + | + | + | - | - | - | - | - | - | + | + | + | T | 0.635 | 0.710 | 0.588 |
| rpl18      | + | + | + | - | + | + | + | + | + | + | + | + | - | - | - | - | - | - | - | - | - | + | F | 0.429 | 0.565 | 0.448 |
| rps5       | + | + | + | + | + | + | + | + | + | + | + | + | - | - | - | - | - | - | - | + | + | + | T | 0.508 | 0.570 | 0.222 |
| secY       | + | + | + | + | + | + | + | + | + | + | + | + | - | - | - | - | - | - | - | - | - | + | T | 0.784 | 0.833 | 0.222 |
| rpl36      | + | + | + | + | + | + | + | + | + | + | + | + | + | + | + | + | + | + | + | + | + | + | F | 0.110 | 0.110 | 0.055 |
| rps13      | + | + | + | + | + | + | + | + | + | + | + | + | - | - | - | - | - | - | - | - | - | + | T | 0.386 | 0.350 | 0.294 |
| rps11      | + | + | + | + | + | + | + | + | + | + | + | + | + | + | + | + | + | + | + | + | + | + | T | 0.431 | 0.431 | 0.157 |
| rpoA       | + | + | + | + | + | + | + | + | + | + | + | + | + | + | + | - | - | + | - | - | + | + | F | 0.738 | 0.794 | 0.400 |
| rpl13      | + | + | + | - | + | + | + | + | + | + | + | + | - | - | - | - | - | - | - | - | - | + | F | 0.788 | 0.841 | 0.531 |
| rps9       | + | + | + | + | + | + | + | + | + | + | + | + | + | + | - | - | + | - | - | - | - | + | T | 0.383 | 0.511 | 0.271 |
| rpl31      | + | + | + | + | + | + | + | + | + | + | + | + | - | - | - | - | - | - | - | - | - | + | F | 0.487 | 0.481 | 0.200 |
| rps12      | + | + | + | + | + | + | + | + | + | + | + | + | + | + | + | + | + | + | + | + | + | + | F | 0.142 | 0.113 | 0.067 |
| rps7       | + | + | + | + | + | + | + | + | + | + | + | + | + | + | + | + | + | + | + | + | + | + | F | 0.402 | 0.446 | 0.182 |
| tufA       | + | + | + | + | + | + | + | + | + | + | + | + | + | + | + | - | + | - | + | + | + | + | T | 0.090 | 0.096 | 0.068 |
| rps10      | + | + | + | + | + | + | + | + | + | + | + | + | - | - | - | - | - | - | - | - | - | + | F | 0.578 | 0.611 | 0.518 |
| petF       | + | + | + | - | + | + | + | + | + | + | + | + | - | - | - | - | - | - | - | - | - | + | T | 0.275 | 0.276 | 0.112 |
| ilvB       | + | + | + | - | - | - | - | + | + | + | + | + | - | - | - | - | - | - | - | - | - | + | T | 0.272 | 0.279 | 0.252 |
| rpl19      | + | + | + | + | + | + | + | + | + | + | + | + | + | - | - | + | - | - | - | - | - | + | F | 0.653 | 0.705 | 0.336 |
| clpC       | + | + | + | + | + | + | + | + | + | + | + | + | - | - | - | - | - | - | - | + | + | + | T | 0.225 | 0.226 | 0.029 |
| rpl11      | + | + | + | - | + | + | + | + | + | + | + | + | - | - | - | - | - | - | - | - | + | - | T | 0.263 | 0.293 | 0.225 |
| rpl1       | + | + | + | - | + | + | + | + | + | + | + | + | - | - | - | - | - | - | - | - | - | + | T | 0.345 | 0.389 | 0.203 |
| rpl12      | + | + | + | - | + | + | + | + | + | + | + | + | - | + | - | - | + | - | + | - | - | + | T | 0.354 | 0.432 | 0.232 |
| ycf20      | + | - | + | + | - | - | - | + | + | + | + | + | - | - | - | - | - | - | - | - | - | + | F |       | 0.808 |       |
| orf91      | + | - | - | - | - | - | - | - | - | - | - | - | - | - | - | - | - | - | - | - | - | - | # |       |       |       |
| secA       | + | + | + | + | + | + | + | + | + | + | + | + | - | - | - | - | - | - | - | - | - | + | T | 0.632 | 0.645 | 0.302 |
| rpl34      | + | + | + | + | + | + | + | + | + | + | + | + | + | - | - | - | - | - | - | - | - | + | F | 0.477 | 0.354 | 0.347 |
| orf555     | + | - | - | - | - | - | - | - | - | - | - | - | - | - | - | - | - | - | - | - | - | - | # |       |       |       |
| rps16      | + | + | + | + | + | + | + | + | + | + | + | + | - | - | - | - | - | - | - | - | - | + | T | 0.519 | 0.383 | 0.333 |
| ycf19      | + | + | + | + | - | - | - | + | + | + | + | + | - | - | - | - | - | - | - | - | - | + | F | 0.970 | 0.911 | 0.112 |
| orf147     | + | - | - | - | - | - | - | - | - | - | - | - | - | - | - | - | - | - | - | - | - | - | # |       |       |       |
| groEL      | + | + | + | + | + | + | + | + | + | + | + | + | - | - | - | - | - | - | - | - | - | + | T | 0.194 | 0.195 | 0.132 |
| ycf29/tctD | + | + | + | - | - | - | - | + | + | + | + | - | - | - | - | - | - | - | - | - | - | + | F | 1.746 | 2.088 | 1.478 |
| orf164     | + | - | - | - | - | - | - | - | - | - | - | - | - | - | - | - | - | - | - | - | - | - | # |       |       |       |
| rpl27      | + | + | + | + | + | + | + | + | + | + | + | + | - | - | - | - | - | - | - | - | - | + | F | 0.595 | 0.558 | 0.229 |
| rpl21      | + | + | + | + | + | + | + | + | + | + | + | + | + | - | - | - | + | - | - | - | - | + | F | 0.888 | 0.929 | 0.243 |
| chlI       | + | + | + | + | + | + | + | + | + | + | + | + | - | + | + | - | - | - | - | - | - | + | F | 0.811 | 0.794 | 0.168 |
