# Supplementary material for: The Complete Plastid Genome Sequence of the Secondarily Nonphotosynthetic Alga Cryptomonas paramecium: Reduction, Compaction, and Accelerated Evolutionary Rate
Source: PubMed Central journal article supplement — Genome Biol Evol. 2009 Nov 13;1:439–48. doi: 10.1093/gbe/evp047 (PMC2839278; doi:10.1093/gbe/evp047), 2009-11-13
Supplement: evp047_2.pdf [file evp047_2.pdf]

Table S2—Codon usage for *Cryptomonas paramecium* (C. par), *Guillardia theta* (G. theta) and *Rhodomonas salina* (R. salina).\*

|     | C. par        | G. theta   | R. salina  |     | C. par        | G. theta  | R. salina  |     | C. par         | G. theta   | R. salina  |     | C. par        | G. theta   | R. salina  |
|-----|---------------|------------|------------|-----|---------------|-----------|------------|-----|----------------|------------|------------|-----|---------------|------------|------------|
| ttt | Phe 23.6(481) | 33.1(1053) | 23.3(768)  | tct | Ser 20.4(415) | 15.8(503) | 22.9(752)  | tat | Tyr 15.6(319)  | 25.6(814)  | 18.5(608)  | tgt | Cys 5.2(106)  | 7.0(225)   | 6.0(198)   |
| ttc | 12.5(256)     | 12.0(382)  | 17.4(572)  | tcc | 9.0(184)      | 2.7(86)   | 2.8(93)    | tac | 12.9(264)      | 7.9(254)   | 12.9(425)  | tgc | 6.0(123)      | 1.2(41)    | 1.8(62)    |
| tta | Leu 31.5(642) | 65.9(2097) | 53.9(1771) | tca | 15.9(324)     | 20.2(643) | 15.6(515)  | taa | Stop 0.0(0)    | 0.0(0)     | 0.0(0)     | tga | Stop 0.0(0)   | 0.0(0)     | 0.0(0)     |
| ttg | 13.3(271)     | 11.5(366)  | 8.1(266)   | tcg | 4.5(92)       | 3.9(125)  | 3.5(116)   | tag | 0.0(0)         | 0.0(0)     | 0.0(0)     | tgg | Trp 6.3(130)  | 11.0(352)  | 11.0(362)  |
| ctt | Leu 20.0(408) | 11.9(380)  | 13.7(453)  | cct | Pro 13.7(279) | 12.4(396) | 18.5(610)  | cat | His 10.8(221)  | 11.7(374)  | 10.1(333)  | cgt | Arg 6.1(126)  | 17.3(552)  | 11.6(381)  |
| ctc | 6.7(137)      | 1.1(38)    | 2.6(86)    | ccc | 4.1(85)       | 1.6(52)   | 1.7(56)    | cac | 10.0(205)      | 4.4(143)   | 5.6(186)   | cgc | 4.9(100)      | 3.3(106)   | 2.1(72)    |
| cta | 22.2(452)     | 13.6(435)  | 18.2(598)  | cca | 18.3(374)     | 19.1(610) | 14.3(472)  | caa | Gln 27.7(565)  | 33.1(1053) | 32.5(1070) | cga | 6.0(122)      | 10.1(323)  | 5.2(172)   |
| ctg | 6.4(132)      | 2.6(84)    | 5.3(175)   | ccg | 2.5(51)       | 2.9(94)   | 2.8(93)    | cag | 8.9(182)       | 4.5(146)   | 6.3(210)   | cgg | 1.6(34)       | 1.7(57)    | 1.0(34)    |
| att | Ile 30.1(613) | 50.3(1602) | 43.5(1430) | act | Thr 21.7(443) | 21.3(680) | 26.5(873)  | aat | Asn 25.6(522)  | 43.0(1369) | 33.5(1100) | agt | Ser 9.2(188)  | 16.5(526)  | 16.6(545)  |
| atc | 16.0(326)     | 9.2(294)   | 15.8(522)  | acc | 9.6(197)      | 3.2(102)  | 2.8(93)    | aac | 20.9(425)      | 11.6(370)  | 16.2(534)  | agc | 10.8(221)     | 4.0(130)   | 5.5(182)   |
| ata | 38.1(775)     | 27.9(890)  | 22.8(751)  | aca | 27.8(566)     | 28.4(903) | 23.0(757)  | aaa | Lys 67.7(1377) | 59.0(1877) | 53.4(1755) | aga | Arg 23.0(469) | 14.9(476)  | 27.8(915)  |
| atg | Met 20.8(424) | 20.1(642)  | 20.9(687)  | acg | 6.1(126)      | 5.3(170)  | 4.2(140)   | aag | 18.9(386)      | 9.2(294)   | 15.8(519)  | agg | 9.6(196)      | 1.8(58)    | 2.7(90)    |
| gtt | Val 23.3(474) | 29.7(945)  | 27.9(918)  | gct | Ala 21.6(441) | 30.0(955) | 37.2(1223) | gat | Asp 24.2(492)  | 37.3(1187) | 34.7(1142) | ggt | Gly 14.5(295) | 38.5(1227) | 31.3(1028) |
| gtc | 7.5(153)      | 4.1(131)   | 5.8(191)   | gcc | 8.3(170)      | 4.7(151)  | 4.3(142)   | gac | 16.1(328)      | 7.5(241)   | 10.6(350)  | ggc | 9.7(198)      | 4.8(154)   | 8.6(285)   |
| gta | 23.3(474)     | 25.4(809)  | 26.3(866)  | gca | 24.3(496)     | 25.6(814) | 22.7(746)  | gaa | Glu 47.6(969)  | 50.3(1601) | 50.2(1649) | gga | 28.3(577)     | 18.8(599)  | 24.8(815)  |
| gtg | 9.9(202)      | 5.8(186)   | 9.2(303)   | gcg | 6.2(127)      | 5.5(176)  | 5.3(176)   | gag | 16.4(334)      | 9.4(302)   | 13.5(444)  | ggg | 12.9(263)     | 4.5(146)   | 4.5(151)   |

\*Codon usage data provided as frequency per thousand and absolute number (in brackets)
